# Supplementary material
Source: Elsevier journal article supplement (https://rcastoragev2.blob.core.windows.net/a364c930f04abf8c7d91970b836c47b7/mmc1.pdf)
Supplement: mmc1 [file mmc1.pdf]

## **Supplemental Information**

### **Wilms Tumor 1b Expression Defines a Pro-regenerative Macrophage Subtype and Is Required for Organ Regeneration in the Zebrafish**

**Andrés Sanz-Morejón, Ana B. García-Redondo, Hanna Reuter, Inês J. Marques, Thomas Bates, María Galardi-Castilla, Andreas Große, Steffi Manig, Xavier Langa, Alexander Ernst, Indre Piragyte, Marius-Alexandru Botos, Juan Manuel González-Rosa, Marta Ruiz-Ortega, Ana M. Briones, Mercedes Salaices, Christoph Englert, and Nadia Mercader**

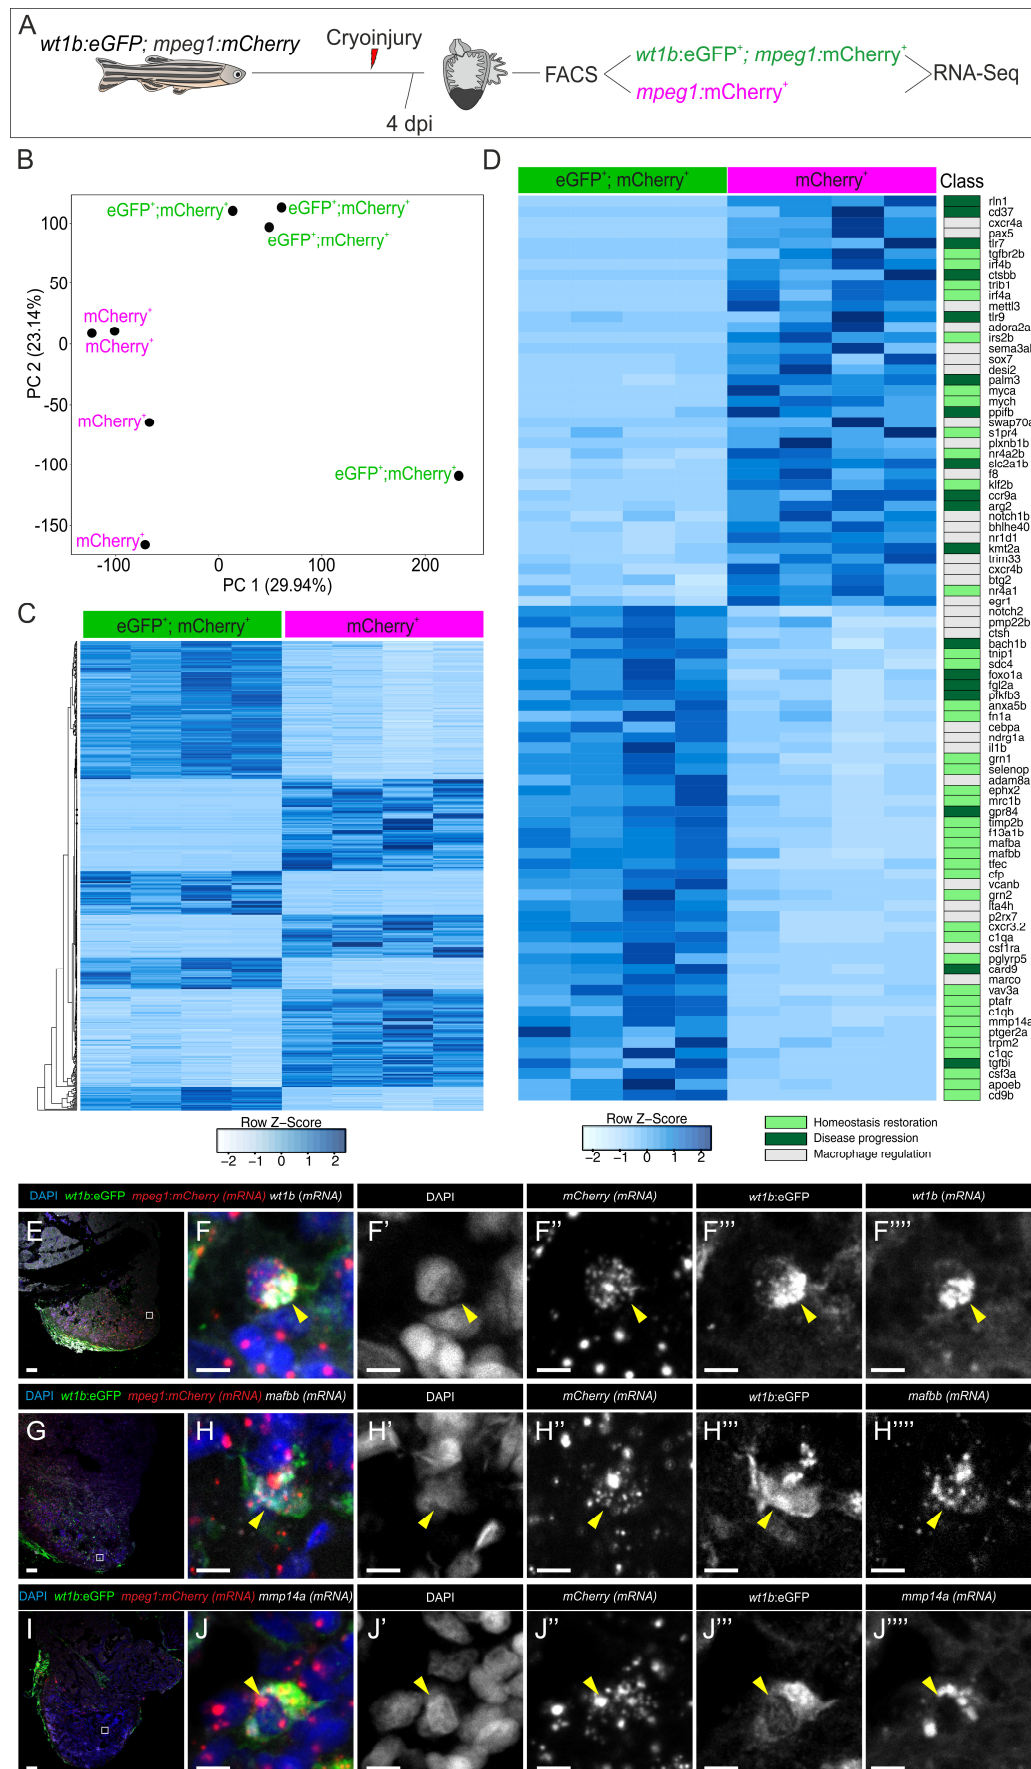

**Figure S1. Differential gene expression of *wt1b*-positive macrophages.** Related to Figure 2 and Table S1. **A**, *wt1b:eGFP<sup>+</sup>;mpeg1:mCherry<sup>+</sup>* and *mpeg1:mCherry<sup>+</sup>* cells were FAC-sorted from cryoinjured adult zebrafish hearts at 4 dpi and their transcriptomes analyzed using RNA-seq. **B**, Principal component analysis of

*wt1b:eGFP<sup>+</sup>;mpeg1:mCherry<sup>+</sup>* and *mpeg1:mCherry<sup>+</sup>* cells. **C**, Heatmap indicating all significant differentially expressed genes between both populations. **D**, Heatmap of genes from (C) whose function has been described in macrophages. Classification of gene function in macrophages according to literature: grey, genes involved in macrophage regulation including differentiation, phagocytosis and apoptosis; light green, genes involved in homeostasis restoration; dark green, genes involved in disease progression. **E-J''''**, Validation of RNA-seq target genes by RNAScope *in situ* hybridization followed by anti-GFP immunostaining on cryoinjured *wt1b:eGFP;mpeg1:mCherry* heart sections at 4 dpi. Signal from *wt1b*, *mafbb* and *mmp14a* antisense riboprobes co-localizes with *mCherry* mRNA and eGFP signal (arrowheads). Note that large dots for mCherry channels represent background staining, and small dots correspond to signal. dpi, days post injury; FACS, fluorescence-activated cell sorting; PC, principal component; Mφ, macrophage. Scale bars, 50 μm (E, G, I) and 5 μm (F-F''', H-H'''' and J-J''').

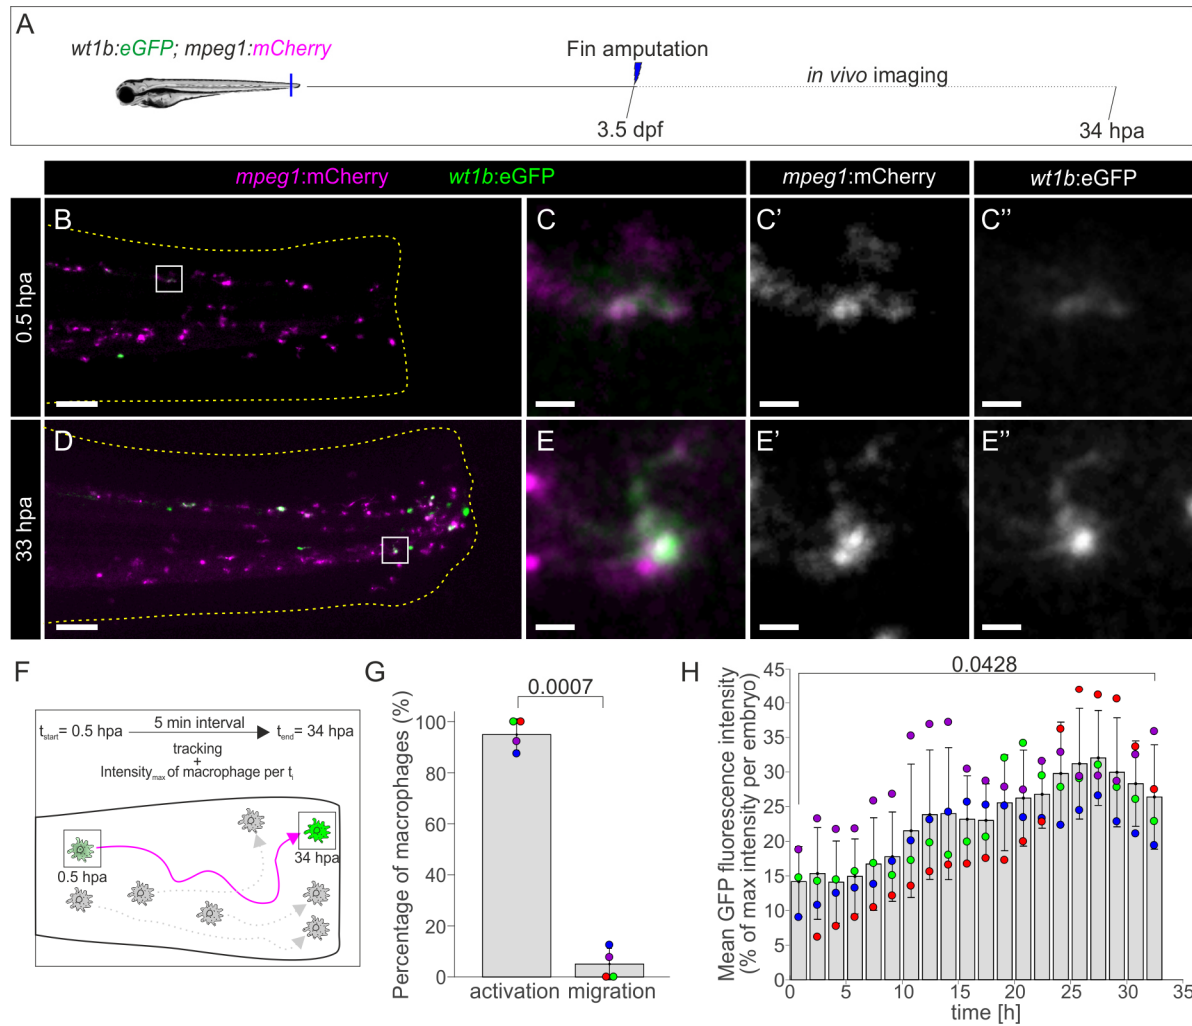

**Figure S2. Activation of *wt1b:eGFP* during migration towards the amputation plane. Related to Figure 3.**

**A**, Caudal fins from *Tg(wt1b:eGFP;mpeg1:mCherry)* zebrafish larvae were amputated at 3.5 dpf and *in vivo* imaging was performed from 0.5 to 34 hpa. **B**, Overview of merged eGFP and mCherry channels at 0.5 hpa. **C–C''**, Merged and single eGFP and mCherry channels of the zoomed views from boxed areas in panel B are shown. **D**, Overview of merged eGFP and mCherry channels at 33 hpa. **E–E''**, Merged and single eGFP and mCherry channels of the zoomed views from boxed areas in panel B are shown. **F**, Scheme of macrophage tracking and fluorescence intensity measurement. *wt1b:eGFP*<sup>+</sup> macrophages were tracked during the entire movie and the maximal GFP intensity within the macrophage was detected simultaneously. **G**, For each of 41 tracked macrophages in 4 embryos an intensity- and localization-based decision (25 % most anterior location and at least 33 % of the macrophage's maximal intensity) defines whether they upregulate *wt1b:eGFP* during migration or are eGFP<sup>+</sup> from the initial time of tracking. The graph shows the overall mean percentage of upregulation (activation) and migration as bars plus the percentage for each of 4 embryos. **H**, Overall mean GFP intensity of the 41 tracked macrophages at different time points (grey bars). Colored dots indicate mean GFP intensity  $\pm$  SD of macrophages in each of the 4 larvae. eGFP levels over time were normalized by maximal measured intensity per larvae. Time-intervals of 1.7 h (20 x 5 min) were binned. Paired t-test was performed. Scale bars: overview images 100  $\mu$ m (B and D), zoomed views 10  $\mu$ m (C–C'' and E–E'').



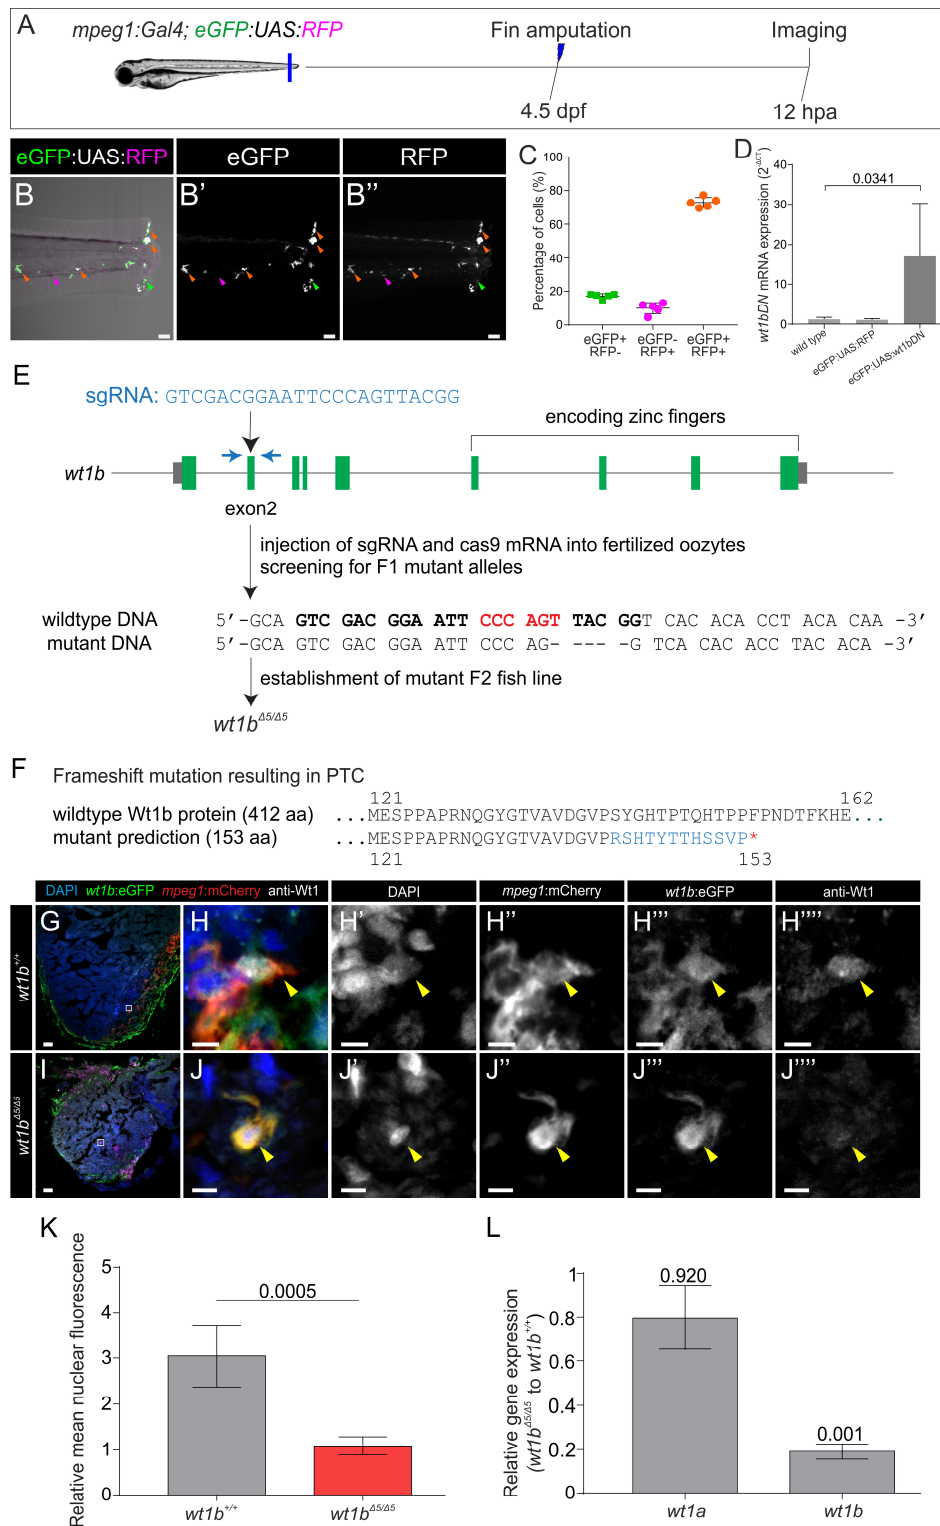

**Figure S3. Validation of genetic lines to assess *wt1b* function. Related to Figures 3, 4 and 5.**

**A-D**, Validation of transgenic lines for macrophage-specific inhibition of *wt1b* function. **A**, Caudal fins of *Tg(mpeg1:Gal4; GFP:UAS:RFP)* larvae were amputated at 4.5 dpf and eGFP and RFP positive cells imaged at 12 hpa. **B-B''**, Images of the caudal fin showing RFP and eGFP positive cells. **B'** and **B''** are single channels for eGFP and RFP. Orange arrowheads, double positive cells; magenta arrowheads, RFP<sup>+</sup> cells; and green arrowheads, eGFP<sup>+</sup> cells. **C**, Quantification of the percentage of eGFP<sup>+</sup>, RFP<sup>+</sup> and double-positive cells. Dots indicate individual fish, shown are means ± SD. Note that over 70% of macrophages are double-positive. **D**, Confirmation of *wt1bDN* overexpression using the *Tg(eGFP:UAS:wt1bDN)* line. *Gal4FF* mRNA was injected into 1-cell stage wildtype, embryos from the transgenic control line *Tg(eGFP:UAS:RFP)* or *Tg(eGFP:UAS:wt1bDN)*. qRT-PCR was performed on cDNA obtained from these larvae. Shown are mean values ± SD (n = 4 biological replicates per

condition). Statistical analysis by Mann-Whitney test. **E-L**, Generation of the *wt1b*<sup>Δ5</sup> mutant line. Related to Figures 4 and 5. **E**, Schematic drawing of the *wt1b* gene locus and workflow for *wt1b* mutant generation. A fish line that lacks 5 nucleotides in exon 2 of the *wt1b* gene (*wt1b*<sup>Δ5</sup>) was established. Blue arrows indicate the forward and reverse primer positions and the *BsrI* restriction site, used to detect indels, is highlighted in red. The sgRNA target sequence is shown in bold. **F**, The 5 nucleotides deletion is predicted to result in a frame shift (blue) and a premature termination codon that leads to a truncation of the protein. **G-J''''**, Immunostaining with anti-WT1, anti-GFP and anti-mCherry on cryoinjured heart sections at 4 days postinjury from *wt1b*<sup>+/+</sup>; *wt1b*:eGFP;*mpeg1*:mCherry and *wt1b*<sup>Δ5/Δ5</sup>; *wt1b*:eGFP;*mpeg1*:mCherry zebrafish. Cell nuclei are counterstained with DAPI. Colocalization (arrowheads) of Wt1 with GFP and mCherry is detected in *wt1b*<sup>+/+</sup> but absent in *wt1b*<sup>Δ5/Δ5</sup>. **K**, Quantification of the relative mean Wt1 nuclear fluorescence in images of *wt1b*:eGFP;*mpeg1*:mCherry cells normalized by background signal. Two-tailed unpaired t test. **L**, Quantitative RT-qPCR analysis of *wt1a* and *wt1b* expression in *wt1b*<sup>Δ5/Δ5</sup> vs. wildtype larvae. Error bars represent standard error. p-values are calculated by pair wise fixed reallocation randomization with REST (n=10). dpf, days post fertilization; hpa, hours post amputation. Scale bars 50 μm (G and I), 40 μm (B-B'') and 5 μm (H-H'''' and J-J''').

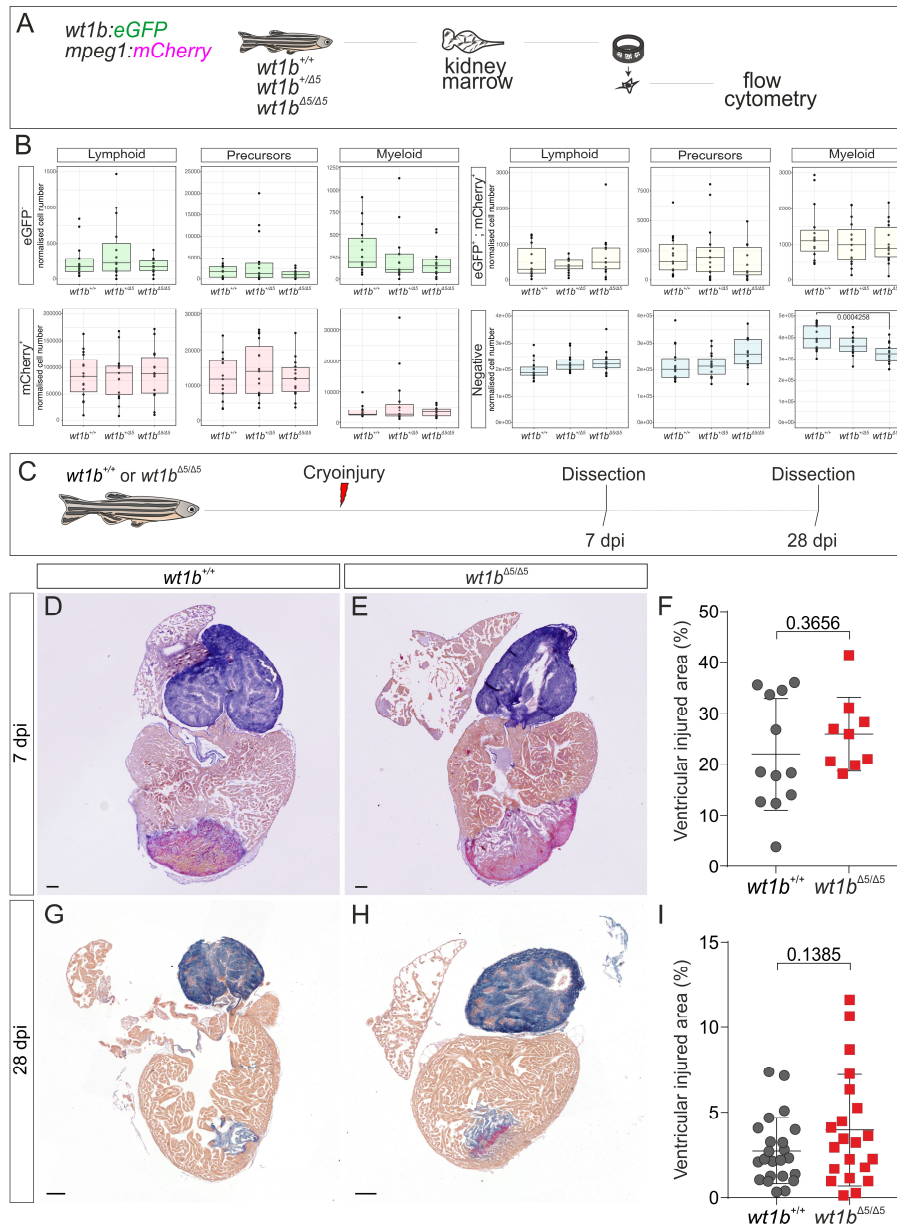

**Figure S4. Phenotypic characterization of *wt1b*<sup>Δ5</sup> mutants. Related to Figure 4 and Figure 5.** Composition of the whole kidney marrow cell populations in *wt1b*<sup>Δ5</sup> mutants. **A**, Whole kidney marrow (WKM) cells of *wt1b*<sup>+/+</sup>, heterozygous *wt1b*<sup>+/Δ5</sup> or homozygous *wt1b*<sup>Δ5/Δ5</sup> crossed into a *Tg(wt1b:eGFP; mpeg1:mCherry)* background fish were isolated. This is the same experiment as described in Figure 4, but here, eGFP<sup>+</sup>, mCherry<sup>+</sup>, double positive populations and the non-fluorescent fraction were analyzed by flow cytometry separately. **B**, Shown are boxplots of normalized cell numbers of cell populations in gate 1 (lymphoid), 2 (precursors) or 3 (myeloid). Normalized cell numbers relate to cell numbers per 10<sup>6</sup> events of living single cells. Negative (non-fluorescent) cell numbers in gate 3 are significantly lower in *wt1b*<sup>Δ5/Δ5</sup> than in *wt1b*<sup>+/+</sup> by one-way ANOVA followed by a Tukey's post-hoc test. **C-I**, Fibrotic tissue deposition and regeneration in *wt1b*<sup>Δ5</sup> mutants. **C**, Ventricular cryoinjury was performed to *wt1b*<sup>+/+</sup> and *wt1b*<sup>Δ5/Δ5</sup> adult fish and fibrosis assessed at 7 and 28 dpi on sectioned hearts using AFOG histological staining to detect collagen. **D, E**, Representative sagittal section of a *wt1b*<sup>Δ5/Δ5</sup> and *wt1b*<sup>+/+</sup> heart stained with AFOG at 7dpi. **F**, Quantification of injured area versus total ventricular area. Data from two independent experiments. Two-tailed unpaired t test. **G-I**, Representative images and quantification of injured cardiac ventricular area at 28 dpi, as shown in D-F. Two-tailed unpaired t test. dpi, days postinjury. Scale bars, 100 μm.

|                                                          |                                        |
|----------------------------------------------------------|----------------------------------------|
| Primers to genotype wt1b $\Delta$ 5/ $\Delta$ 5 mutants: | For: 5'-GTGAACTCTTGAAATGTCACTACAAGC-3' |
|                                                          | Rev: 5-ACCGCTGATGAATAAAGGGACTAAC-3'    |
| qPCR primers, wt1b (heart RT-qPCR):                      | Fw: 5'-GGCCTGGAATCCTGTTAGC-3'          |
|                                                          | Rv: 5'-CAGAGGAGGTGCTCCTGAAG-3'         |
| qPCR primers, wt1b (larvae RT-qPCR):                     | Fw: 5'-TGCTGATCCTCCTTCTAGCC-3'         |
|                                                          | Rv: 5'-GAACGGAGGAGTGTGTTGTG-3'         |
| qPCR primers, wt1a (larvae RT-qPCR):                     | Fw: 5'-AGCCAACCAAGGATGTTCAG-3'         |
|                                                          | Rv: 5'-CCTCGTGTTTGAAGGAGTGG-3'         |
| qPCR primer, efl $\alpha$ (larvae RT-qPCR):              | Fw: 5'-AAGAGAACCATCGAGAAGTTCGA-3'      |
|                                                          | Rv: 5'-ACCCAGGCGTACTTGAAGGA-3'         |
| qPCR primers, wt1bDN (larvae RT-qPCR):                   | Fw: 5'-TATTTGCCAGGCTGCATGGA-3'         |
|                                                          | Rv: 5'-TCGGGTCCTCGTGTTTGAAG-3'         |
| qPCR primers, efl $\alpha$ (larvae RT-qPCR):             | Fw: 5'-CAGCTGATCGTTGGAGTCAA-3'         |
|                                                          | Rv: 5'-TGTATGCGCTGACTTCCTTG-3'         |

**Table S2. List of primers used to genotype wt1b $\Delta$ 5/ $\Delta$ 5 mutants and to perform RT-qPCRs. Related to STAR Methods and the Key Resources Table.**
